# Supplementary material for: Novel Series of Dual NRF2 Inducers and Selective MAO-B Inhibitors for the Treatment of Parkinson’s Disease
Source: MDPI journal article supplement (doi:10.3390/antiox11020247), 2022-01-27
Supplement: s1 [file s1]

Supplementary data

# **Novel series of dual NRF2 inducers and selective MAO-B inhibitors for the treatment of Parkinson's disease**

**Pablo Duarte <sup>1,2</sup>, Patrycja Michalska <sup>3</sup>, Enrique Crisman <sup>1,2,4</sup>, Antonio Cuadrado <sup>5</sup> and Rafael León <sup>1,\*</sup>**

<sup>1</sup> Instituto de Química Médica, Consejo Superior de Investigaciones Científicas (IQM-CSIC), 28006 Madrid, Spain.

<sup>2</sup> Instituto Teófilo Hernando y Departamento de Farmacología y Terapéutica, Facultad de Medicina. Universidad Autónoma de Madrid, 28029 Madrid, Spain.

<sup>3</sup> Chemistry Department, Imperial College London, London, UK.

<sup>4</sup> Instituto de Investigación Sanitaria La Princesa (IIS-IS), Hospital Universitario de la Princesa, 28006 Madrid, Spain.

<sup>5</sup> Departamento de Bioquímica, Facultad de Medicina, Centro de Investigación Biomédica en Red Sobre Enfermedades Neurodegenerativas (CIBERNED), Instituto de Investigación Sanitaria La Paz (IdiPaz), Instituto de Investigaciones Biomédicas 'Alberto Sols' UAM-CSIC, Universidad Autónoma de Madrid, Madrid, Spain.

\* Correspondence: rafael.leon@iqm.csic.es

## TABLE OF CONTENTS

### 1. Supporting experimental data

|                                                                              |    |
|------------------------------------------------------------------------------|----|
| 1.1. Physicochemical properties                                              | 3  |
| 1.2. Cytotoxicity. LD <sub>50</sub> values in several cell cultures employed | 4  |
| 1.3. PAMPA control compounds (BBB permeability)                              | 4  |
| 1.4. Neuroprotection in oxidative stress-related models                      | 5  |
| 1.5. Original western blot images                                            | 5  |
| 1.6. MAO-B binding mode elucidation                                          | 10 |

|                      |    |
|----------------------|----|
| 2. Copies of spectra | 11 |
|----------------------|----|

## 1. Supporting experimental data

### 1.1. Physicochemical properties

Physicochemical properties predictions for compounds **10-18** were carried out using SwissADME platform [1]. Compounds did not show any violation of the Lipinski's rule of five. In addition, they were all predicted to be soluble or moderately soluble in water. These results, together with the good permeability values for central nervous system evaluated by PAMPA assay, are important for the drug absorption processes. Furthermore, the parental compound melatonin showed similar physicochemical properties compared to compounds **10-18**, especially closed to those lacking the aryl-acrylate moiety.

**Table S1.** Physicochemical properties for compounds **10-18**.

| Compound         | Molecular weight (g/mol) | Log P <sub>o/w</sub> <sup>a</sup> | Num. H-bond donors | Num. H-bond acceptors | Lipinski <sup>b</sup> | Log S <sup>c</sup> | Solubility class <sup>d</sup> |
|------------------|--------------------------|-----------------------------------|--------------------|-----------------------|-----------------------|--------------------|-------------------------------|
| <b>Melatonin</b> | 232.28                   | 0.97                              | 2                  | 2                     | 0 violat.             | -2.34              | Soluble                       |
| <b>10</b>        | 228.29                   | 1.68                              | 2                  | 2                     | 0 violat.             | -2.36              | Soluble                       |
| <b>11</b>        | 344.41                   | 3.15                              | 2                  | 3                     | 0 violat.             | -4.66              | Moderately soluble            |
| <b>12</b>        | 358.43                   | 3.36                              | 2                  | 3                     | 0 violat.             | -5.04              | Moderately soluble            |
| <b>13</b>        | 266.34                   | 2.35                              | 1                  | 2                     | 0 violat.             | -2.79              | Soluble                       |
| <b>14</b>        | 382.45                   | 3.71                              | 1                  | 3                     | 0 violat.             | -5.08              | Moderately soluble            |
| <b>15</b>        | 396.48                   | 3.91                              | 1                  | 3                     | 0 violat.             | -5.46              | Moderately soluble            |
| <b>16</b>        | 242.27                   | 1.15                              | 2                  | 2                     | 0 violat.             | -2.84              | Soluble                       |
| <b>17</b>        | 358.39                   | 2.65                              | 2                  | 3                     | 0 violat.             | -5.13              | Moderately soluble            |
| <b>18</b>        | 372.42                   | 2.87                              | 2                  | 3                     | 0 violat.             | -5-51              | Moderately soluble            |

a) MLOGP: Topological method implemented from Moriguchi I. et al. [2, 3] and Lipinski PA. et al. [4]; b) Lipinski (Pfizer) filter implemented from Lipinski CA. et al. [4]. Violations: more than 5 H-bond donors, 10 H-bond acceptors, the molecular weight is greater than 500 and the calculated MlogP > 4.15; c) Ali: Topological method implemented from Ali J. et al. [5]; d) Solubility class is defined as follows: Log S scale - Insoluble < -10 < Poorly < -6 < Moderately < -4 < Soluble < -2 Very < 0 < Highly.

## 1.2. Cytotoxicity. LD<sub>50</sub> values in several cell cultures employed

**Table S2.** Cytotoxicity elicited by **10-18** compounds in SH-SY5Y, ARec32 and mixed primary glial cultures. Viability was measured as MTT reduction in presence of increasing concentrations of derivatives. LD<sub>50</sub> values were calculated from dose-response curves. Data are expressed as mean  $\pm$  SEM of at least 3 independent experiments.

| Compound   | LD <sub>50</sub> ( $\mu$ M)<br>SH-SY5Y | LD <sub>50</sub> ( $\mu$ M)<br>ARec32 | LD <sub>50</sub> ( $\mu$ M)<br>Mixed primary glial<br>cultures |
|------------|----------------------------------------|---------------------------------------|----------------------------------------------------------------|
| Melatonin  | > 100                                  | > 30                                  | > 30                                                           |
| Rasagiline | > 100                                  | > 30                                  | NE                                                             |
| 10         | > 100                                  | > 30                                  | > 30                                                           |
| 11         | 16.4 $\pm$ 2.32                        | 7.83 $\pm$ 1.2                        | 17.8 $\pm$ 2.9                                                 |
| 12         | 11.6 $\pm$ 0.90                        | 11.1 $\pm$ 2.0                        | 7.42 $\pm$ 1.3                                                 |
| 13         | > 100                                  | > 30                                  | > 30                                                           |
| 14         | 66.5 $\pm$ 9.8                         | > 30                                  | > 30                                                           |
| 15         | 48.3 $\pm$ 6.6                         | > 30                                  | > 30                                                           |
| 16         | 4.87 $\pm$ 0.60                        | 3.83 $\pm$ 0.68                       | 8.81 $\pm$ 2.2                                                 |
| 17         | 9.06 $\pm$ 0.31                        | < 1                                   | 0.543 $\pm$ 0.14                                               |
| 18         | 6.87 $\pm$ 1.3                         | < 1                                   | 1.21 $\pm$ 0.24                                                |

NE: not evaluated.

## 1.3. PAMPA control compounds (BBB permeability)

**Table S3.** Prediction of the BBB passive permeability of control compounds expressed as Pe  $\pm$  SEM.

| Compound  | PAMPA                                        |            |
|-----------|----------------------------------------------|------------|
|           | Pe<br>(10 <sup>-6</sup> cm s <sup>-1</sup> ) | Prediction |
| Verapamil | 17.5 $\pm$ 4.2                               | CNS +      |
| Caffeine  | 1.65 $\pm$ 1.5                               | CNS -      |

## 1.4. Neuroprotection in oxidative stress-related models

**Table S4.** Neuroprotective activity of compounds **10-18** against the toxicity exerted by rotenone/oligomycin A mixture (30/10  $\mu$ M) and 6-hydroxydopamine (100  $\mu$ M). SH-SY5Y cells were treated with compounds **10-18** (0.1  $\mu$ M) or reference compounds (melatonin and rasagiline, 0.1  $\mu$ M) during 24 h. Thereafter, cells were treated with compounds **10-18**, melatonin or rasagiline (0.1  $\mu$ M) and the corresponding toxic stimuli for 24 h. Cell viability was assessed by the MTT assay. Data are expressed as mean  $\pm$  SEM of at least 3 independent experiments (N= 3-4 for each experiment). Statistical analysis was performed following one-way ANOVA ( $p < 0.05$ ). \* $p < 0.05$ , \*\* $p < 0.002$  and \*\*\* $p < 0.001$  vs the toxic condition after Newman-Keuls post-hoc test.

| Compound   | R/O (30/10 $\mu$ M) |                | 6-OHDA             |                |
|------------|---------------------|----------------|--------------------|----------------|
|            | Cell viability (%)  | Protection (%) | Cell viability (%) | Protection (%) |
| Basal      | 100                 |                | 100                |                |
| Toxic      | 59.4 $\pm$ 3.3      |                | 62.2 $\pm$ 4.0     |                |
| Melatonin  | 70.0 $\pm$ 6.3      | 22.3*          | 97.0 $\pm$ 4.7     | 88.8***        |
| Rasagiline | 68.5 $\pm$ 3.7      | 28.9*          | 92.4 $\pm$ 5.4     | 77.0***        |
| 10         | 75.6 $\pm$ 9.9      | 44.6*          | 94.0 $\pm$ 7.1     | 83.5***        |
| 11         | 80.9 $\pm$ 4.0      | 48.6***        | 53.2 $\pm$ 1.6     | NA             |
| 12         | 83.4 $\pm$ 6.4      | 53.5***        | 46.1 $\pm$ 7.2     | NA             |
| 13         | 75.8 $\pm$ 5.5      | 42.7**         | 95.4 $\pm$ 5.3     | 87.4***        |
| 14         | 79.8 $\pm$ 6.2      | 53.3***        | 90.3 $\pm$ 4.2     | 71.7***        |
| 15         | 74.0 $\pm$ 5.2      | 36.4**         | 81.4 $\pm$ 4.6     | 41.5***        |
| 16         | 78.5 $\pm$ 3.2      | 47.3***        | 81.9 $\pm$ 8.3     | 48.1**         |
| 17         | 79.1 $\pm$ 7.9      | 49.3**         | 89.0 $\pm$ 5.0     | 58.4***        |
| 18         | 72.5 $\pm$ 3.9      | 32.1**         | 82.1 $\pm$ 6.0     | 43.8***        |

NA: not active

## 1.5. Original western blot images

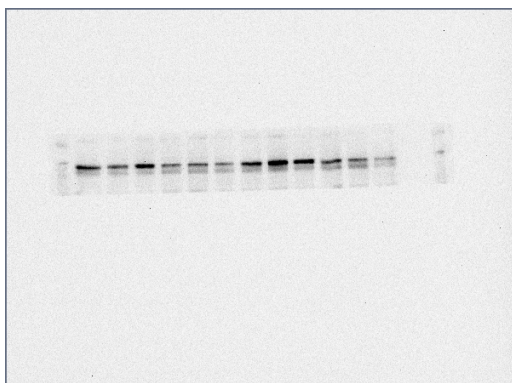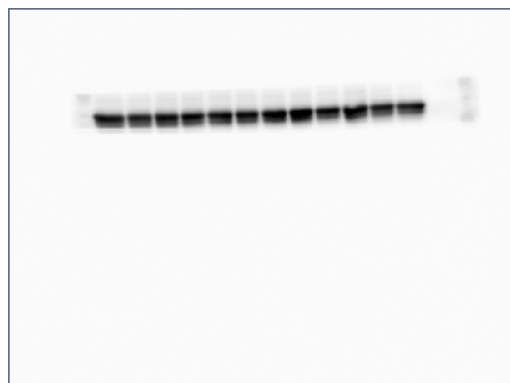

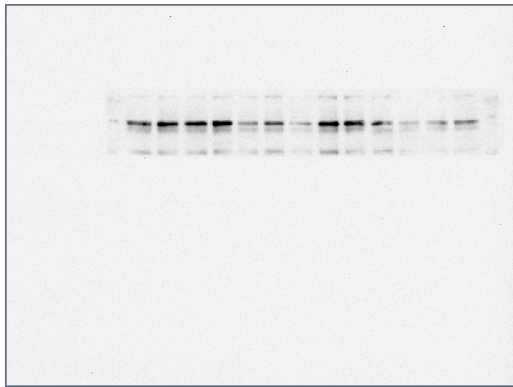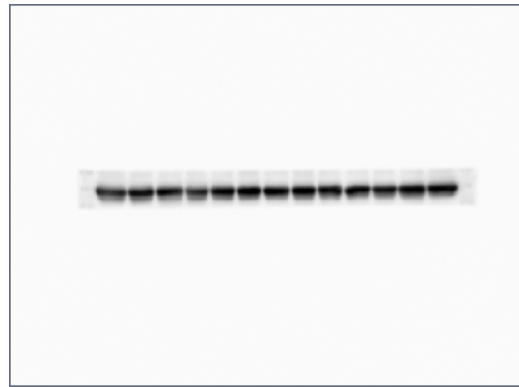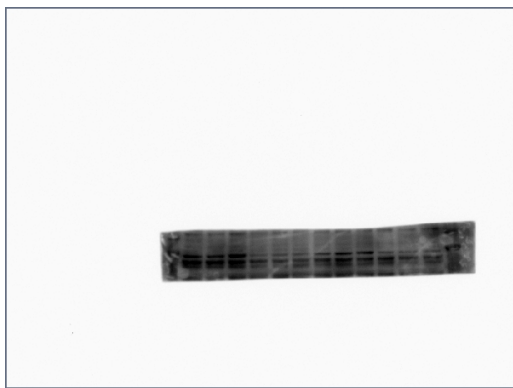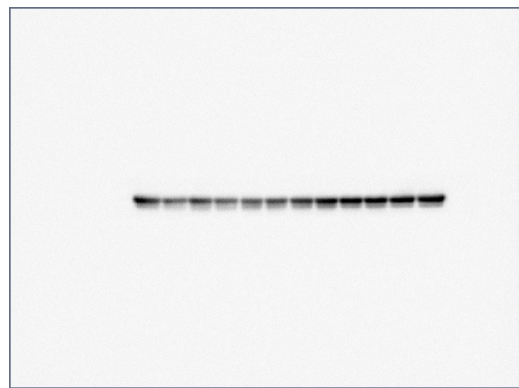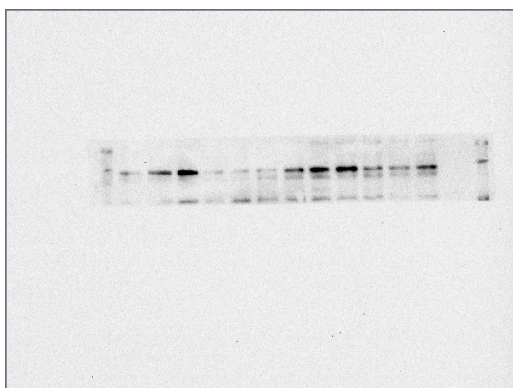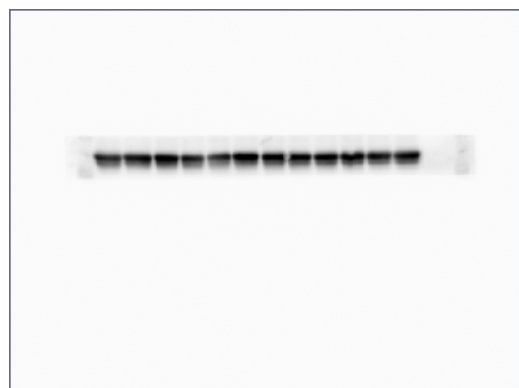

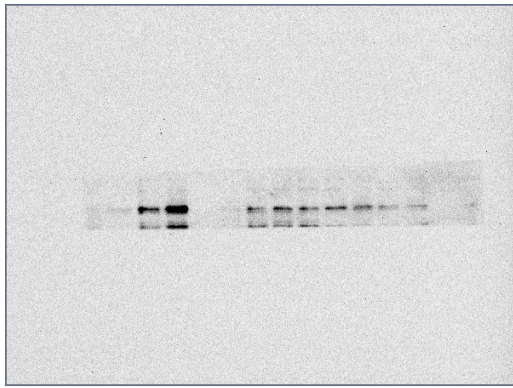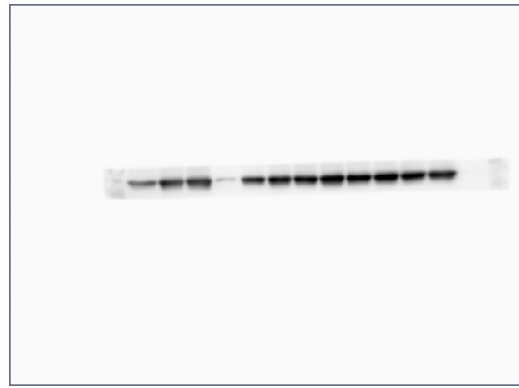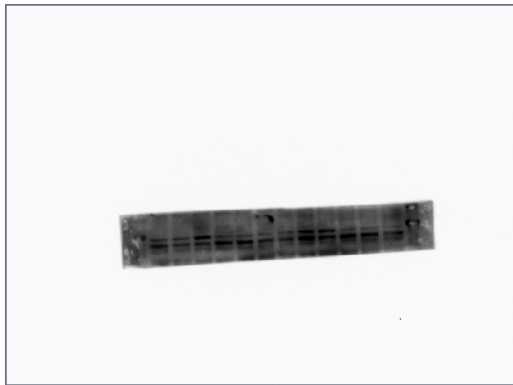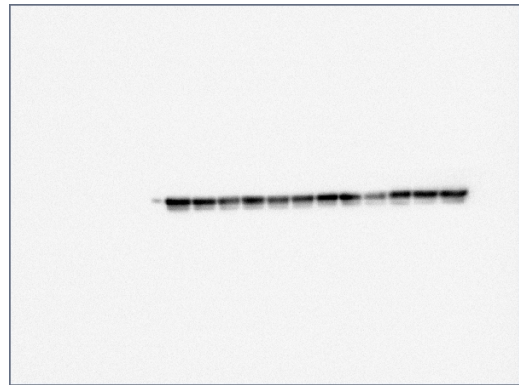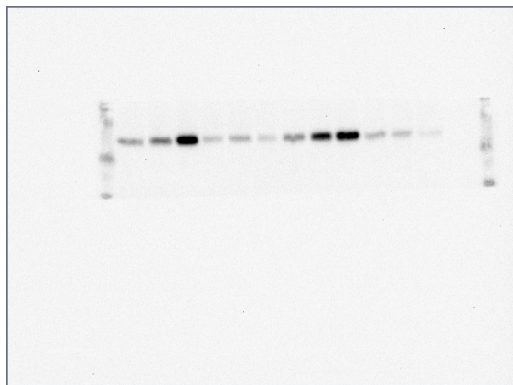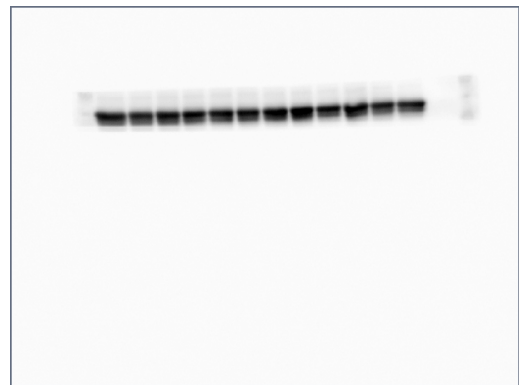

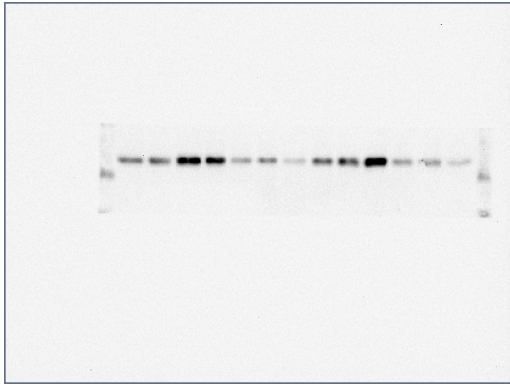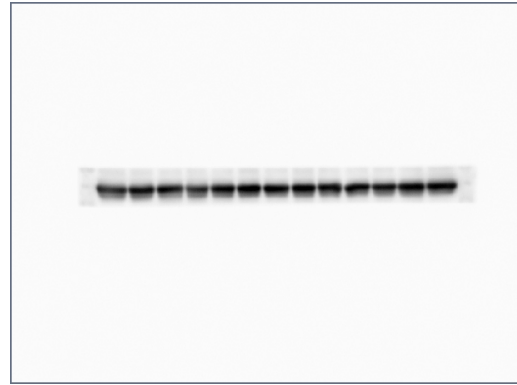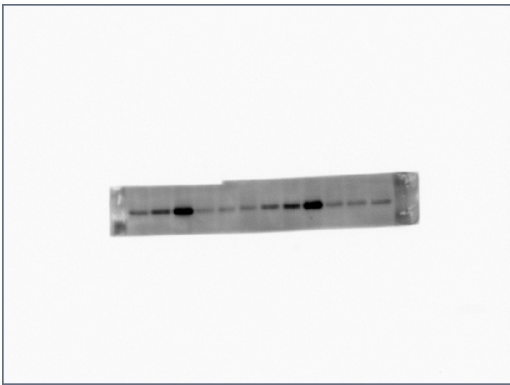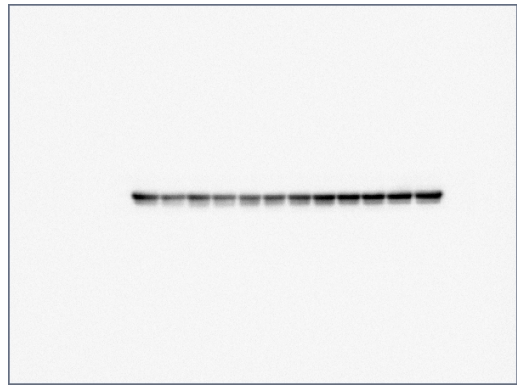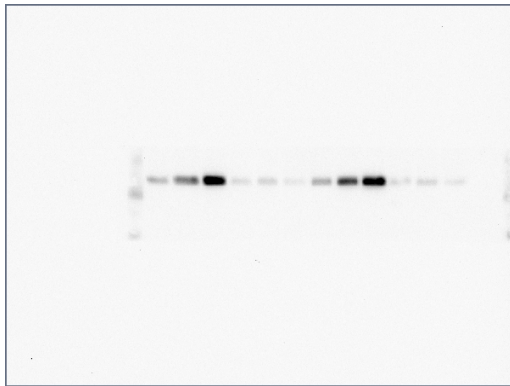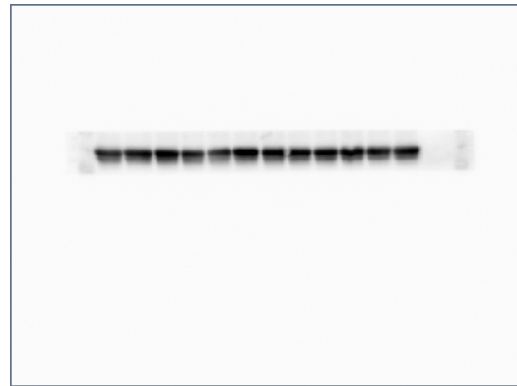



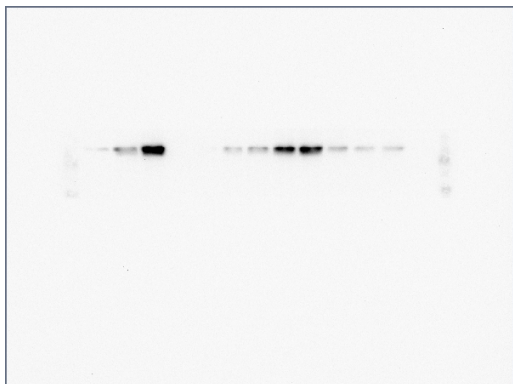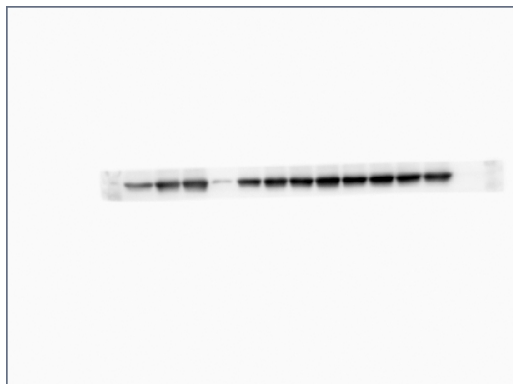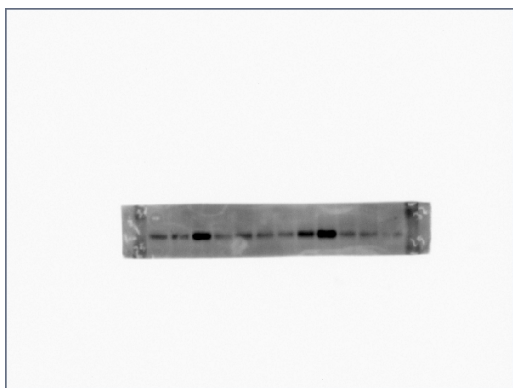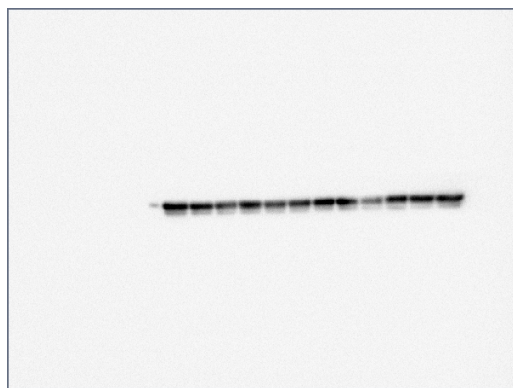

## 1.6. MAO-B binding mode elucidation

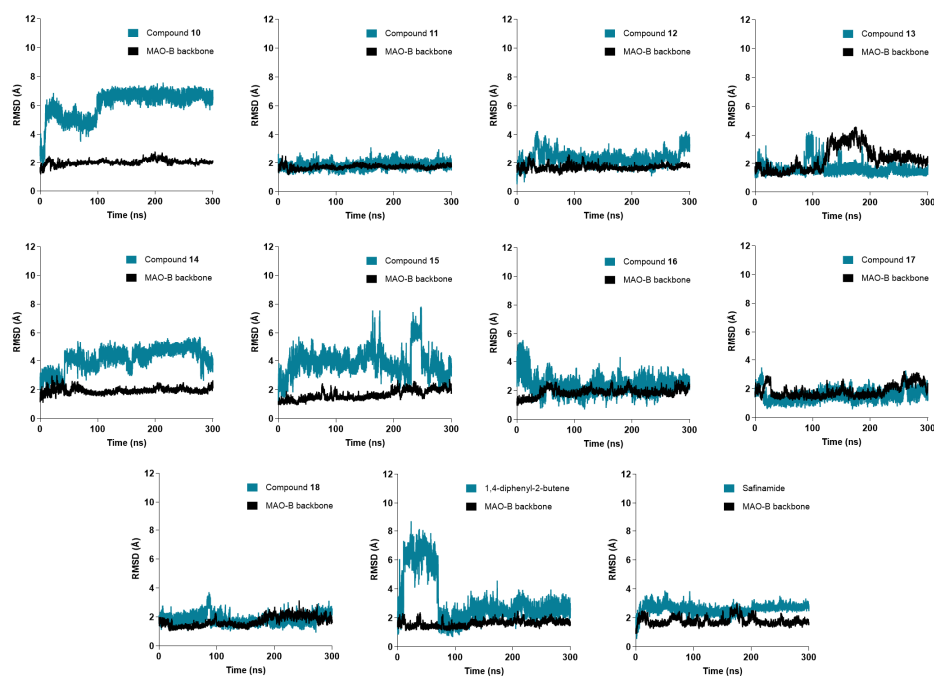

**Figure S1. Root-mean-square deviation of atomic positions (RMSD) calculations during molecular dynamics simulations.** RMSD is calculated for MAO-B backbone, compounds 10-18, and reference compounds safinamide and 1,4-diphenyl-2-butene.

### 3. Copies of spectra

#### 3-(2-((*tert*-butoxycarbonyl)amino)ethyl)-1*H*-indol-5-yl cinnamate (6)

<sup>1</sup>H NMR (300 MHz, DMSO)

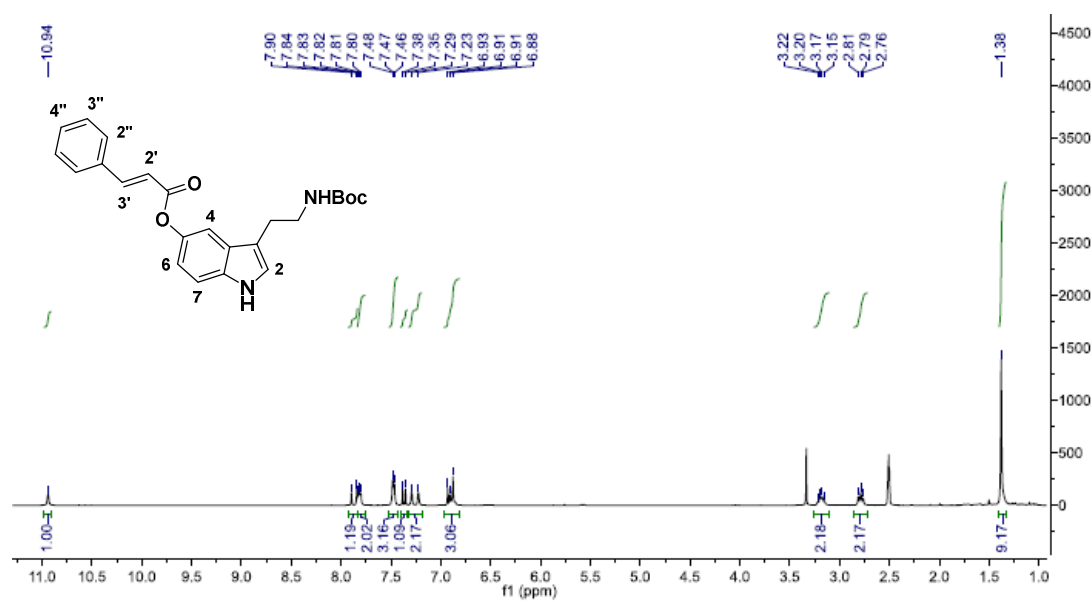

<sup>13</sup>C NMR (75 MHz, DMSO)

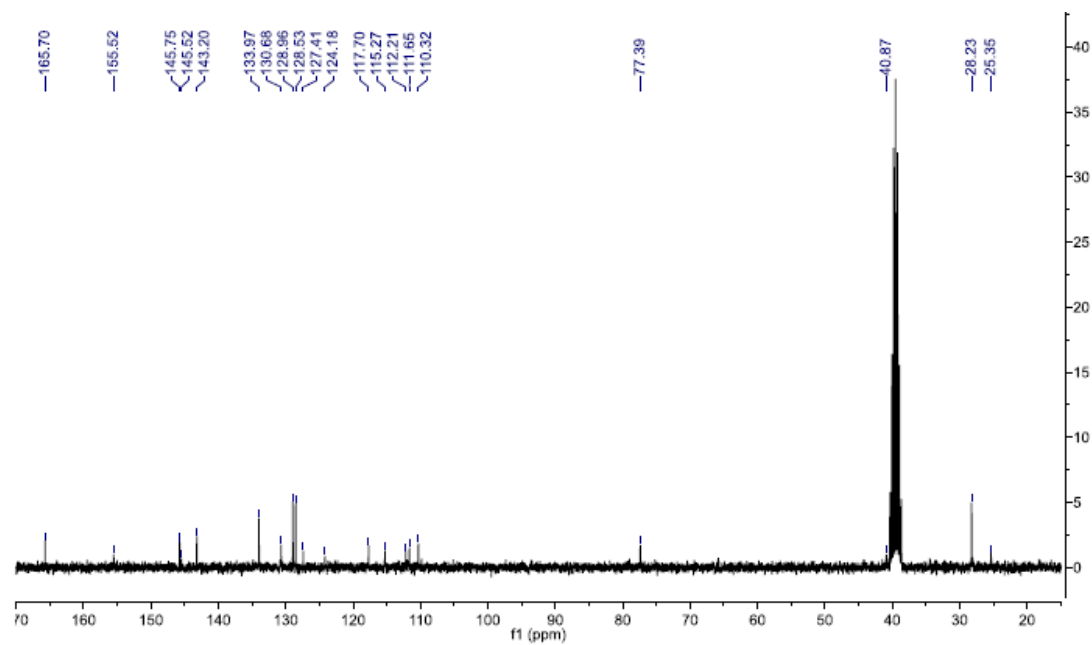

**(E)-3-(2-((*tert*-butoxycarbonyl)amino)ethyl)-1*H*-indol-5-yl 3-*p*-tolylacrylate (7)**

<sup>1</sup>H NMR (300 MHz, DMSO)

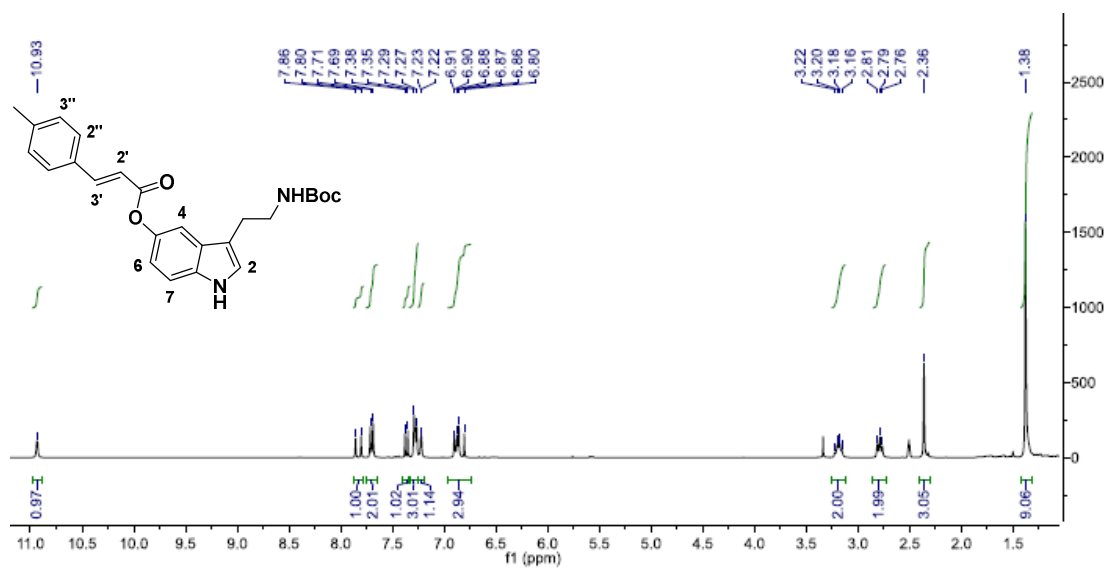

<sup>13</sup>C NMR (75 MHz, DMSO)

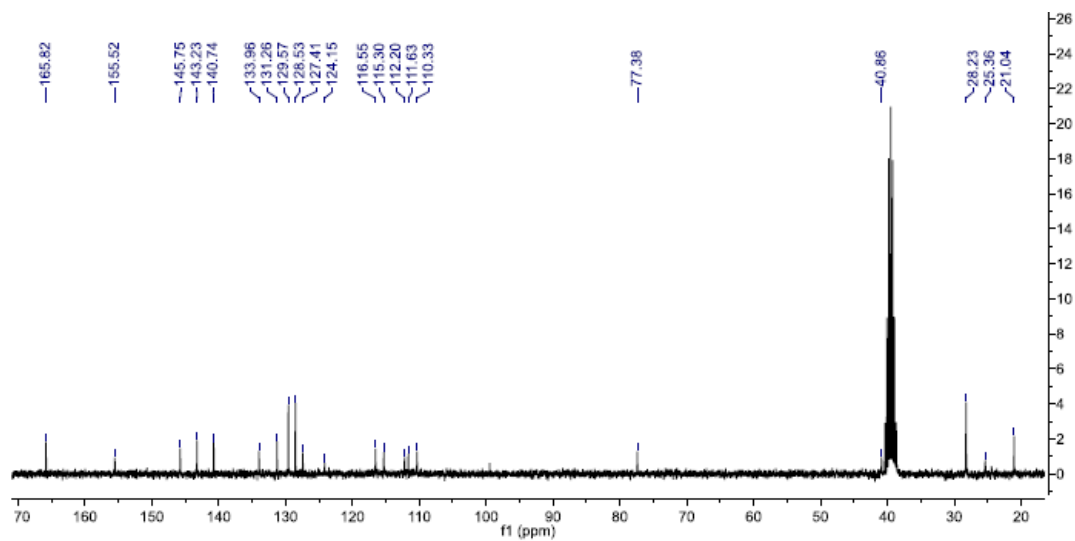

### 3-(2-aminoethyl)-1*H*-indol-5-yl cinnamate (8)

<sup>1</sup>H NMR (300 MHz, DMSO)

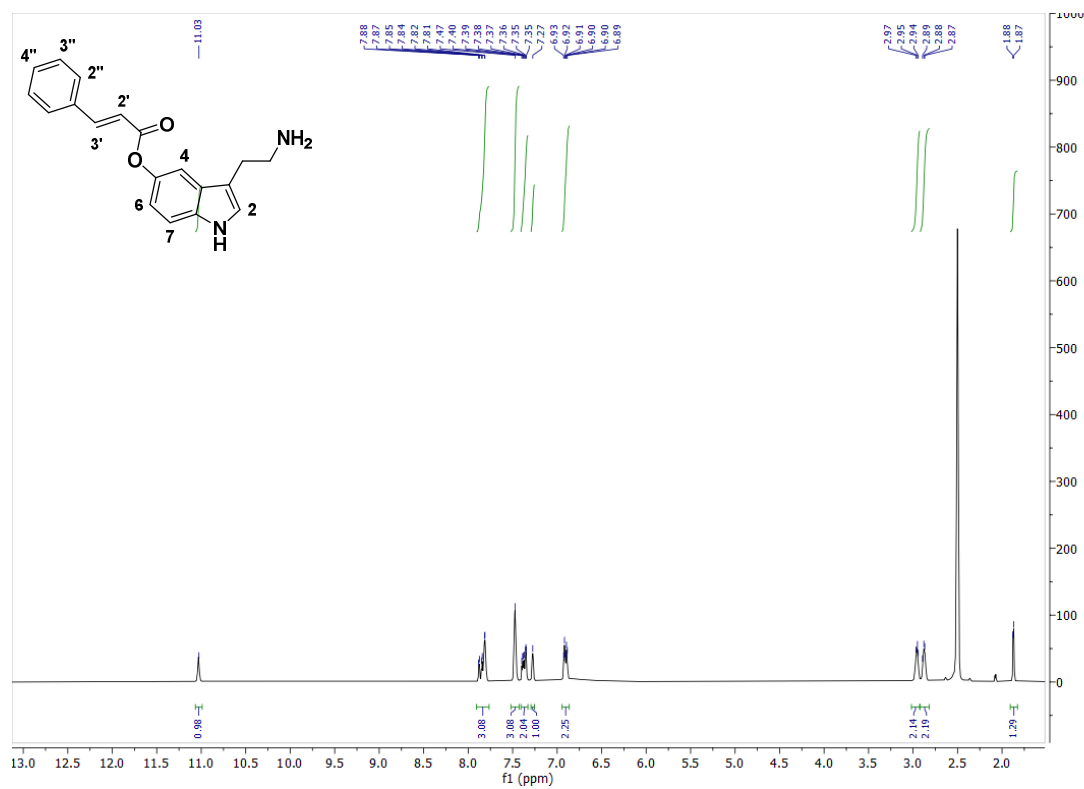

<sup>13</sup>C NMR (75 MHz, DMSO)

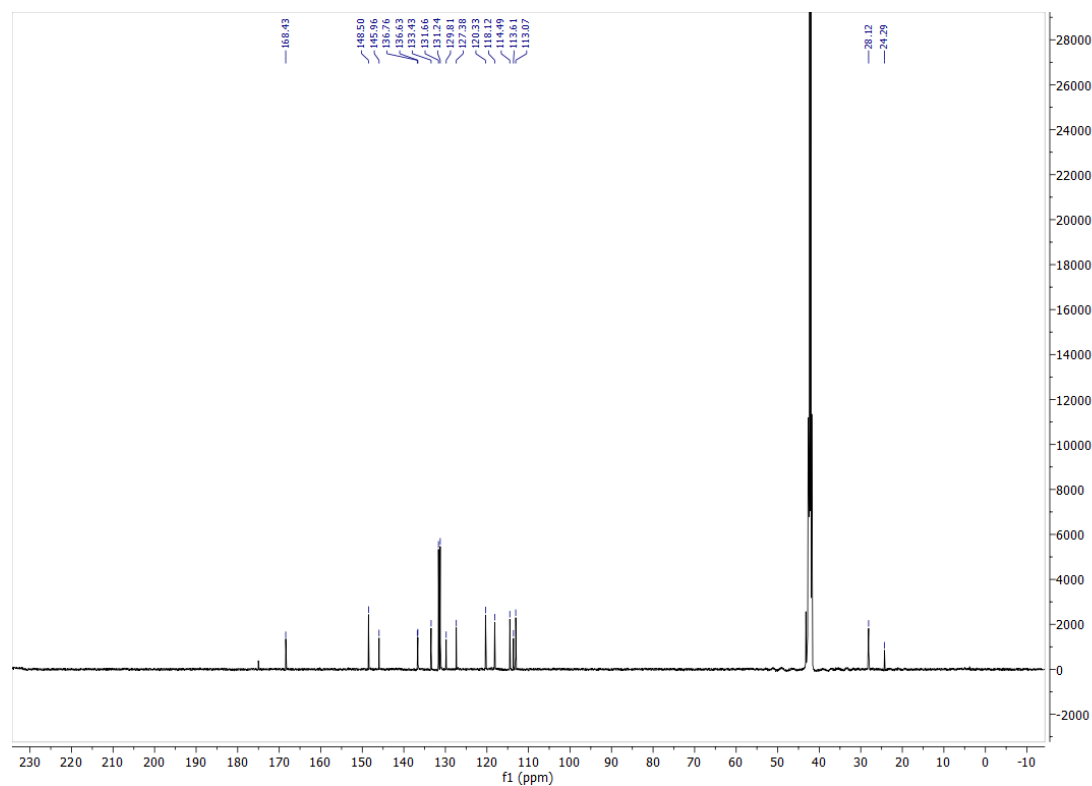

### 3-(2-aminoethyl)-1*H*-indol-5-yl (*E*)-3-(*p*-tolyl)acrylate (9)

<sup>1</sup>H NMR (300 MHz, DMSO)

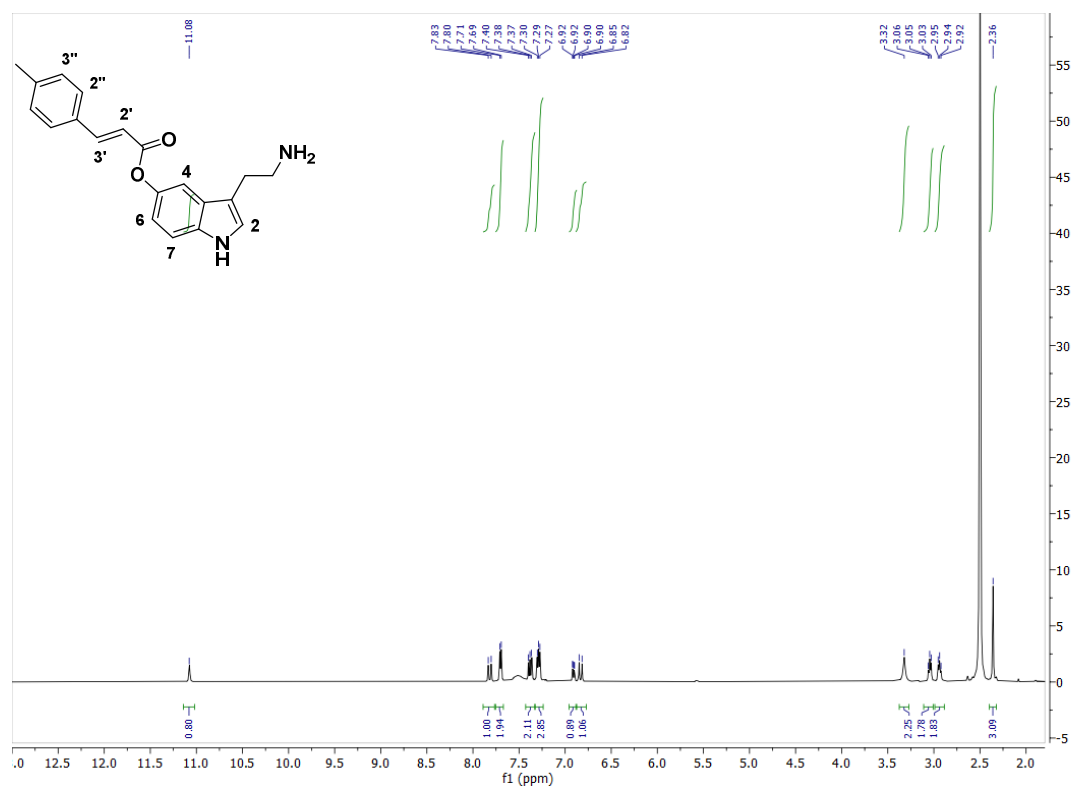

<sup>13</sup>C NMR (75 MHz, DMSO)

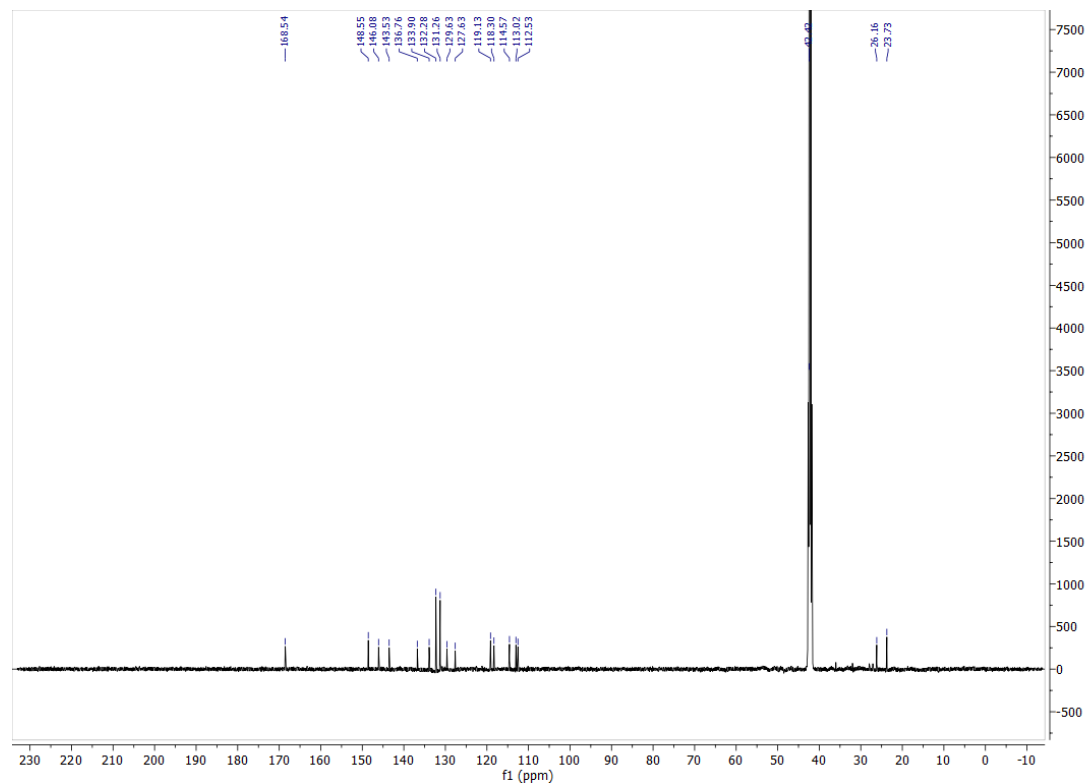

**N-(2-(5-methoxy-1H-indol-3-yl)ethyl)prop-2-yn-1-amine (10)**

<sup>1</sup>H NMR (300 MHz, DMSO)

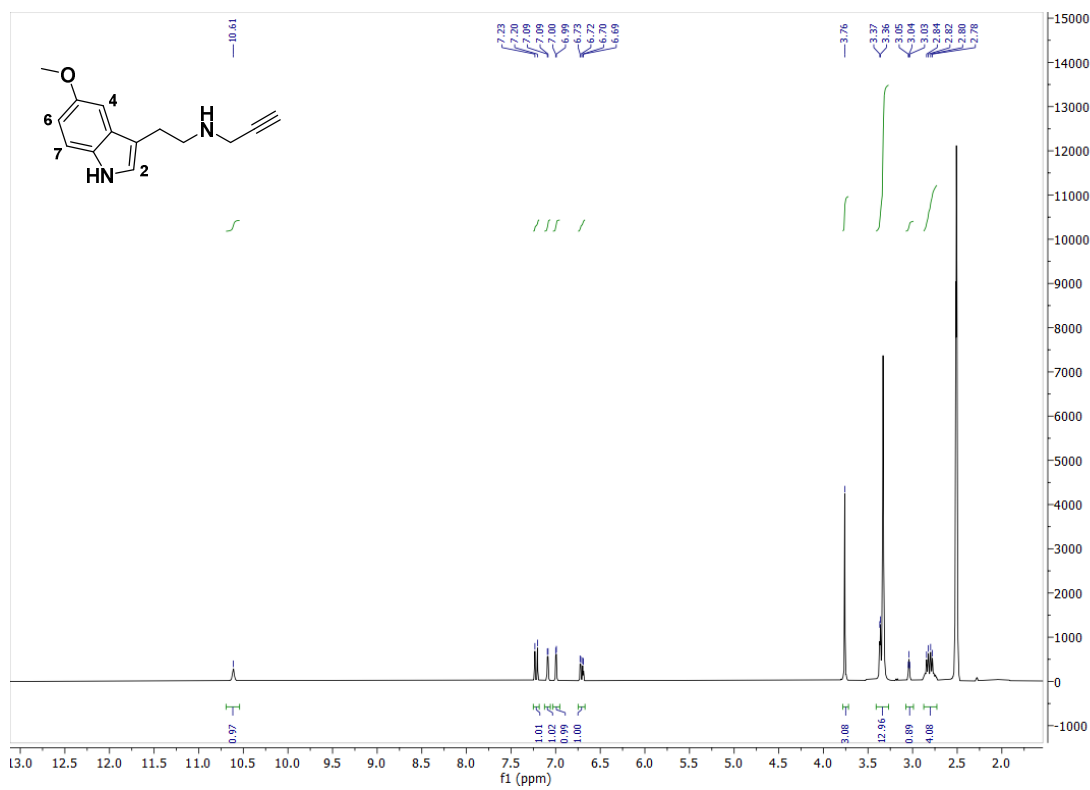

<sup>13</sup>C NMR (75 MHz, DMSO)

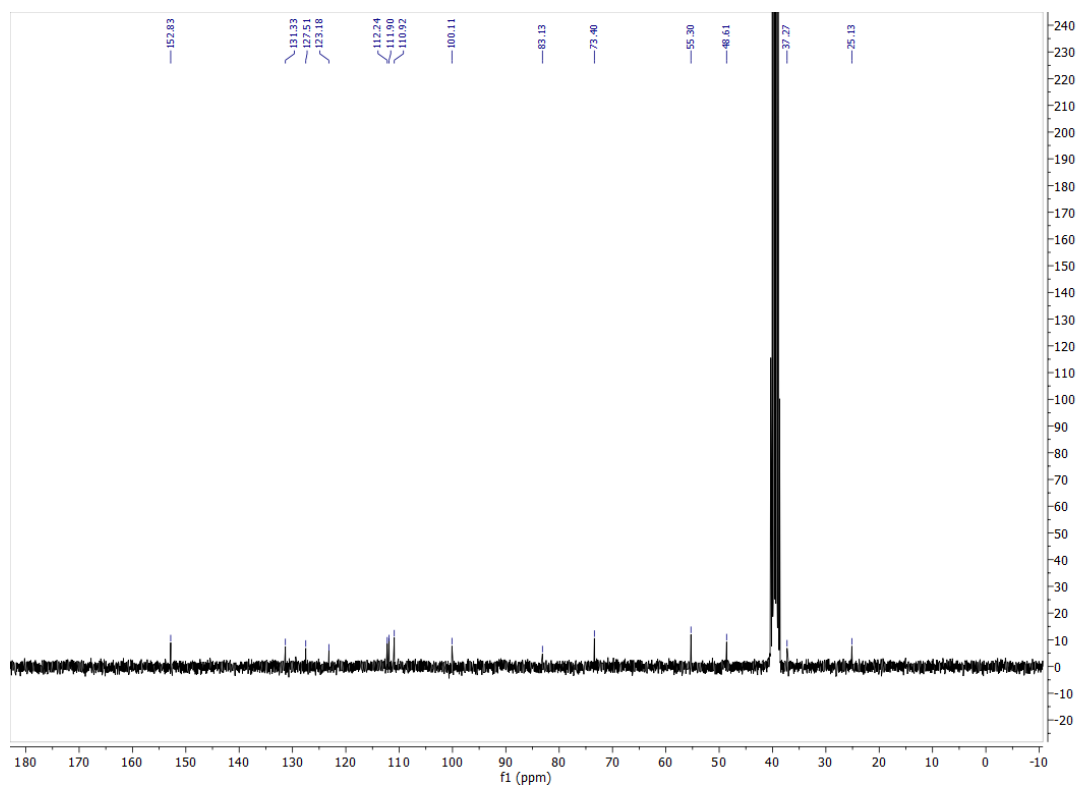

3-(2-(prop-2-yn-1-ylamino)ethyl)-1H-indol-5-yl cinnamate (11)

<sup>1</sup>H NMR (300 MHz, DMSO)

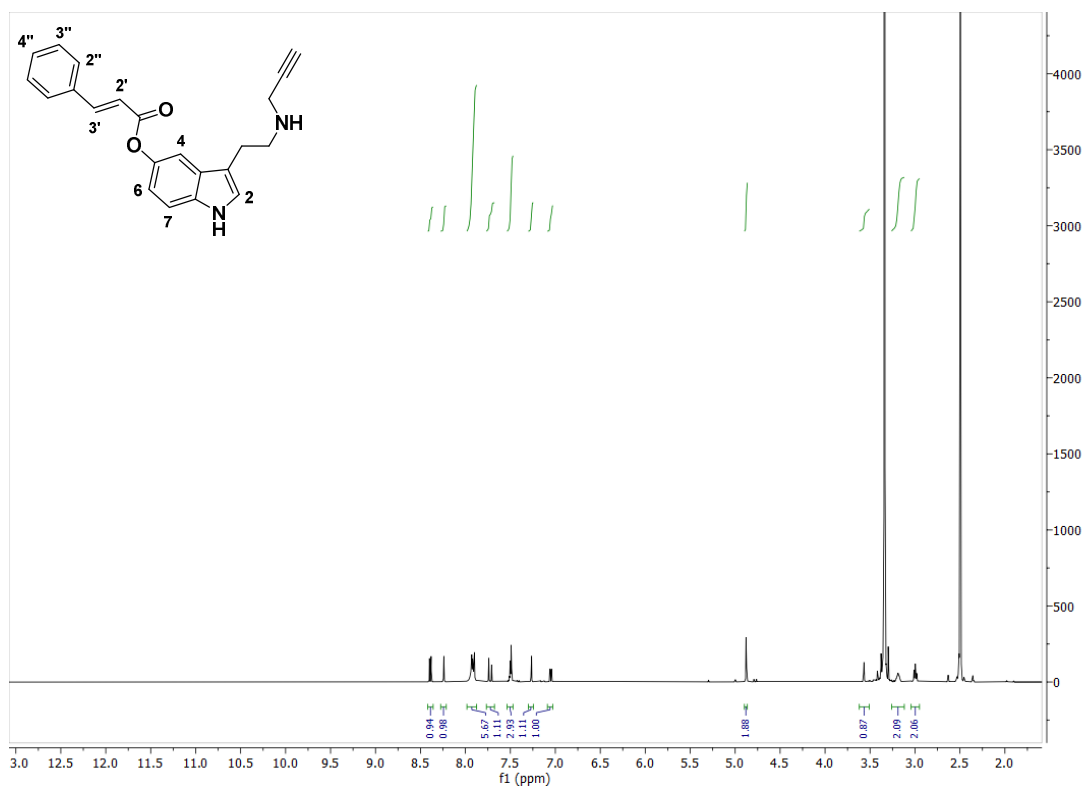

<sup>13</sup>C NMR (75 MHz, DMSO)

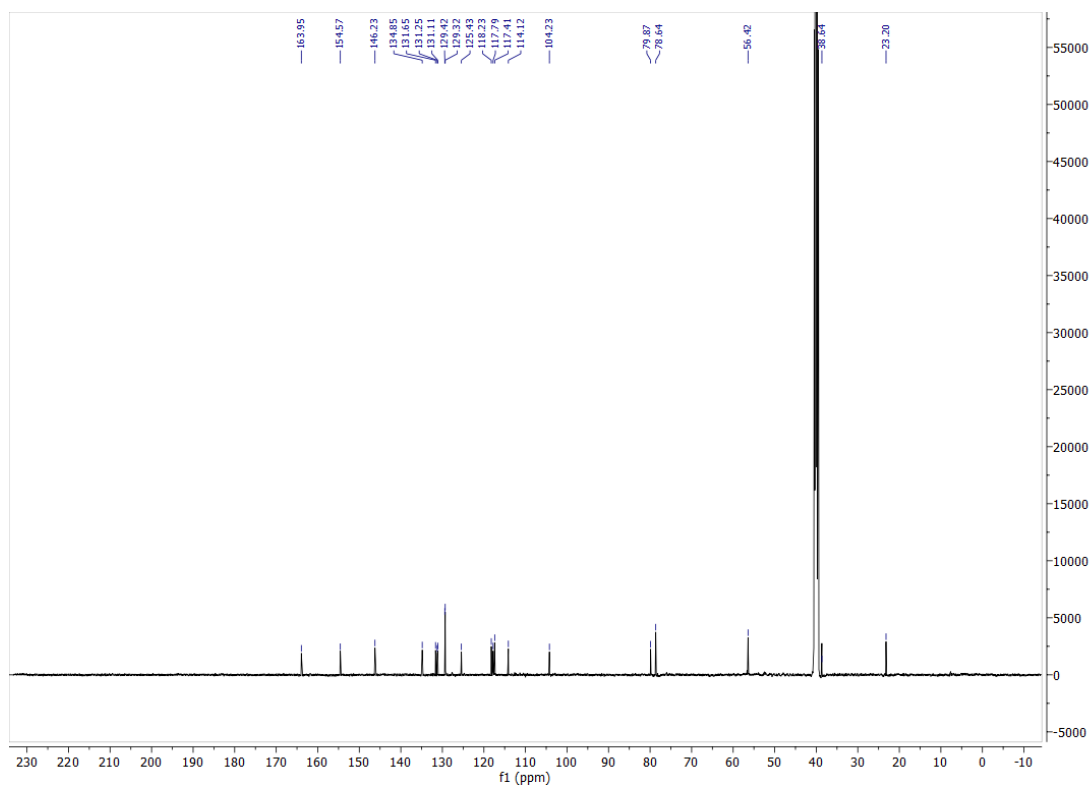

**3-(2-(prop-2-yn-1-ylamino)ethyl)-1H-indol-5-yl (E)-3-(p-tolyl)acrylate (12)**

<sup>1</sup>H NMR (300 MHz, DMSO)



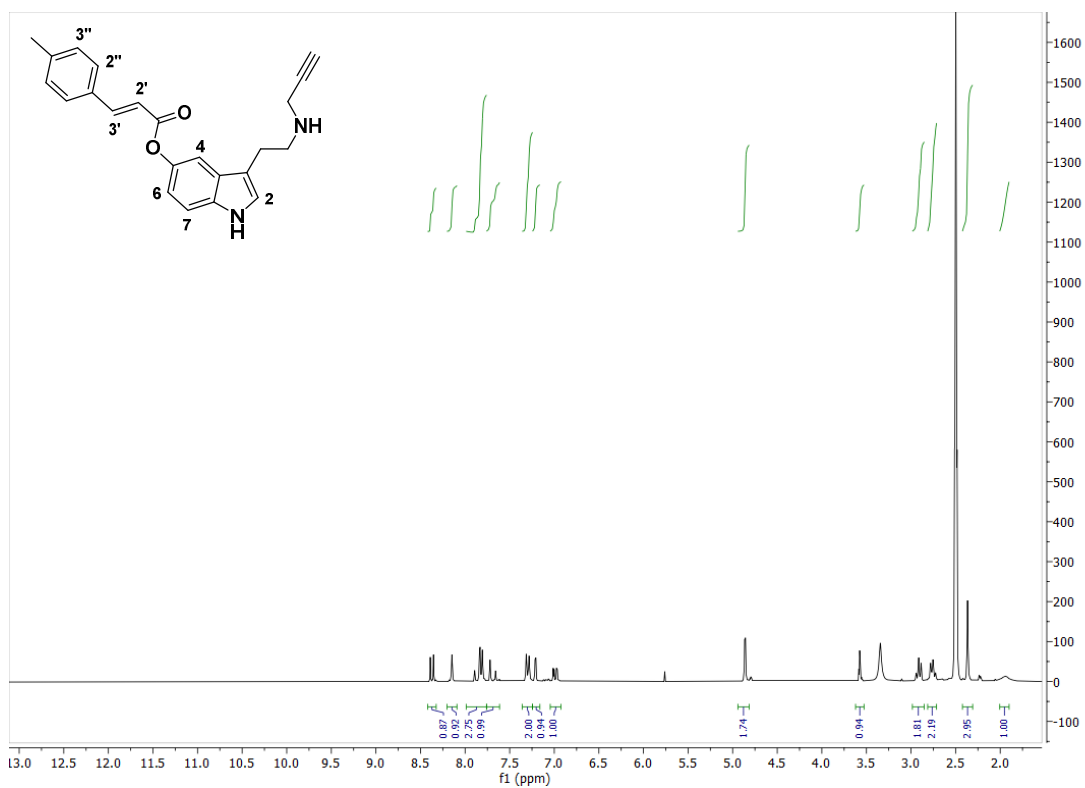

<sup>13</sup>C NMR (75 MHz, DMSO)

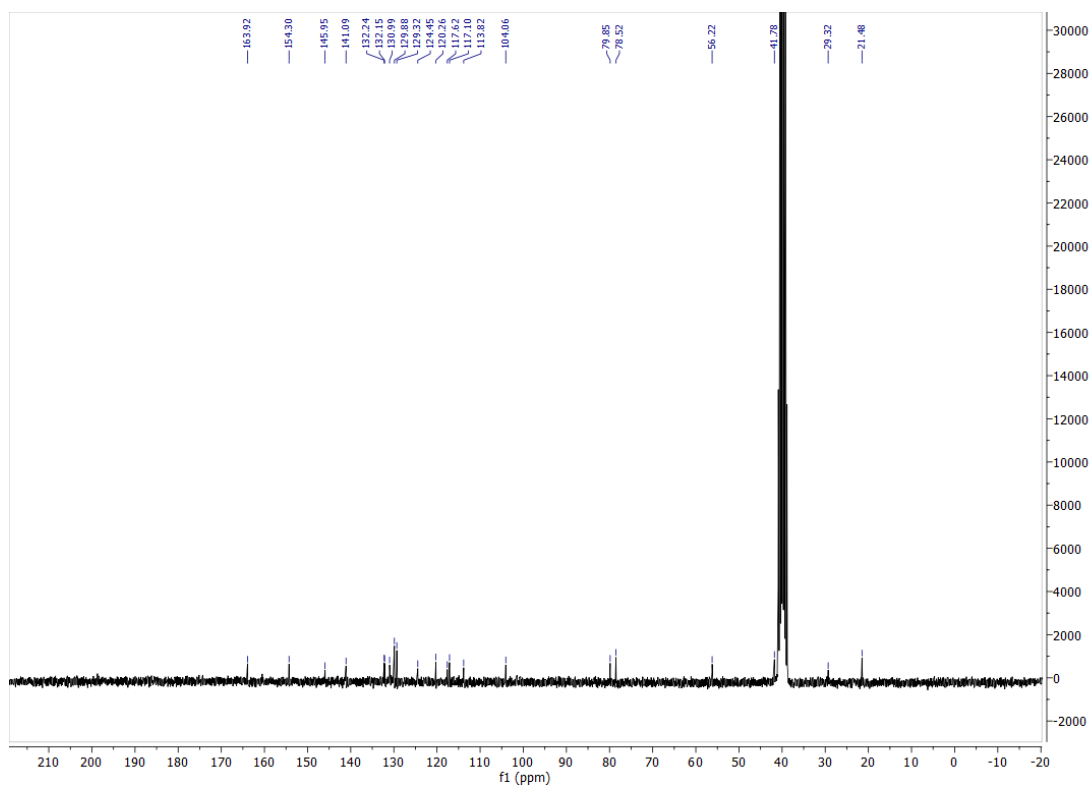

**N-(2-(5-methoxy-1H-indol-3-yl)ethyl)-N-(prop-2-yn-1-yl)prop-2-yn-1-amine (13)**

<sup>1</sup>H NMR (300 MHz, DMSO)

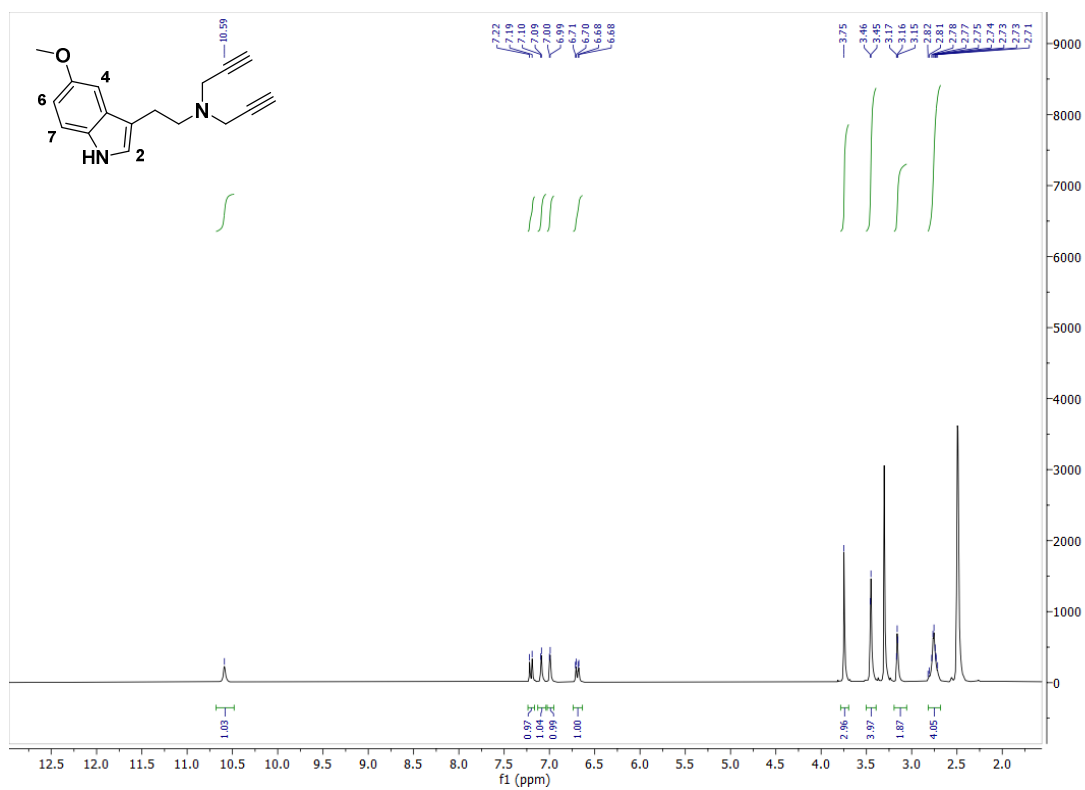

**<sup>13</sup>C NMR (75 MHz, DMSO)**

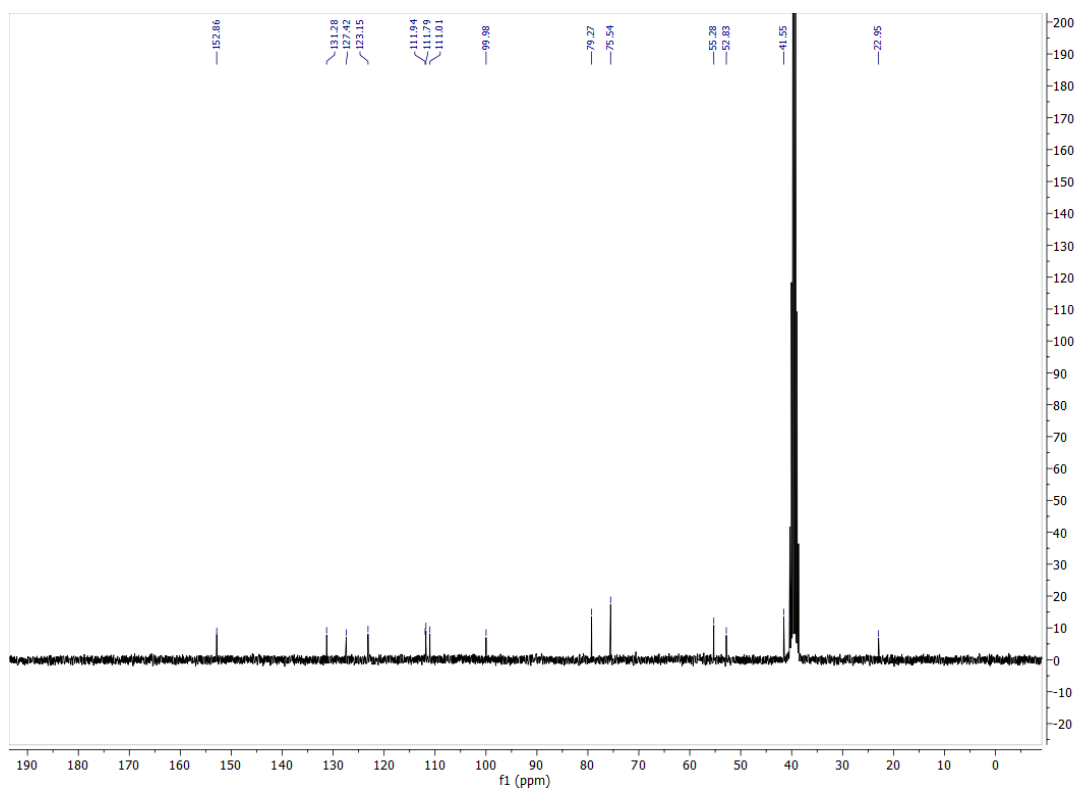

**3-(2-(di(prop-2-yn-1-yl)amino)ethyl)-1H-indol-5-yl cinnamate (14)**

**<sup>1</sup>H NMR (300 MHz, DMSO)**

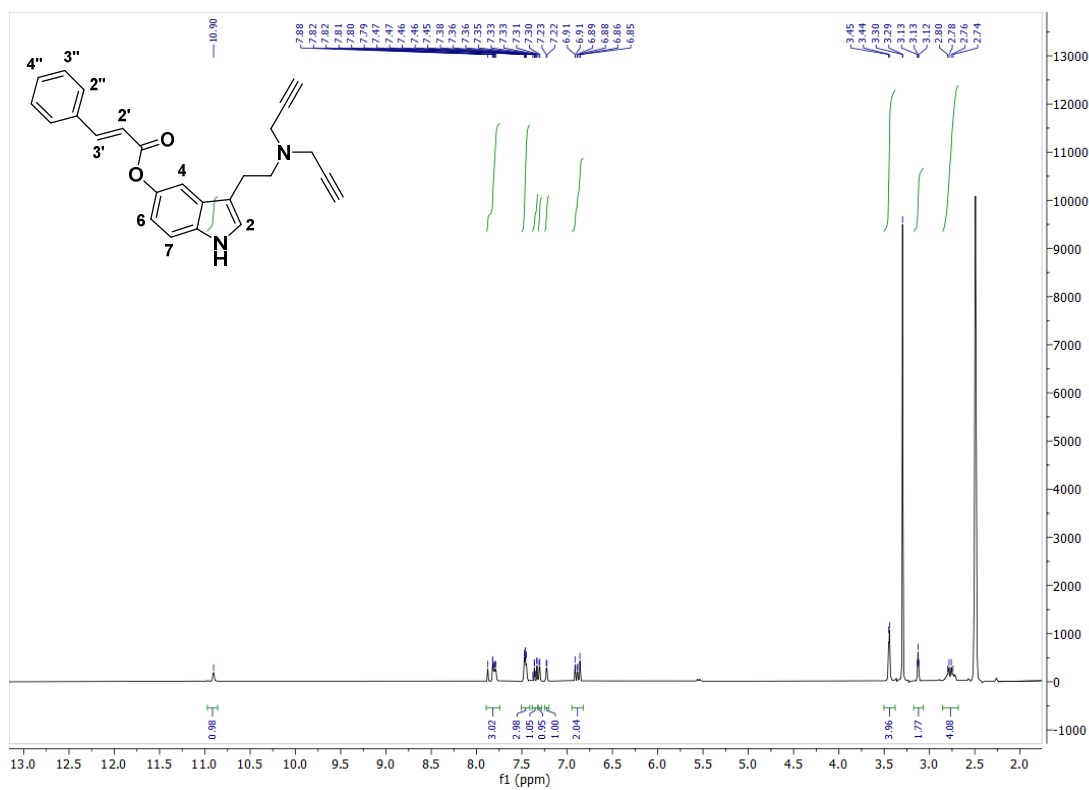

<sup>13</sup>C NMR (75 MHz, DMSO)

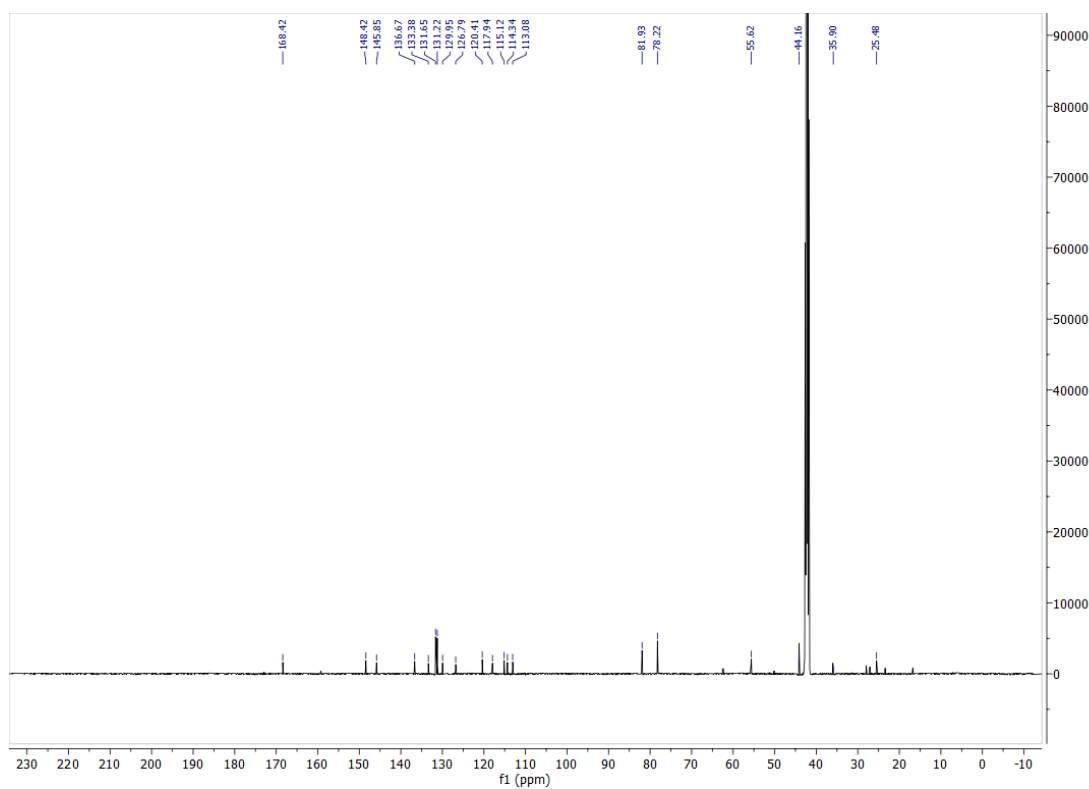

**3-(2-(di(prop-2-yn-1-yl)amino)ethyl)-1H-indol-5-yl-(E)-3-(p-tolyl) acrylate (15)**

<sup>1</sup>H NMR (300 MHz, DMSO)



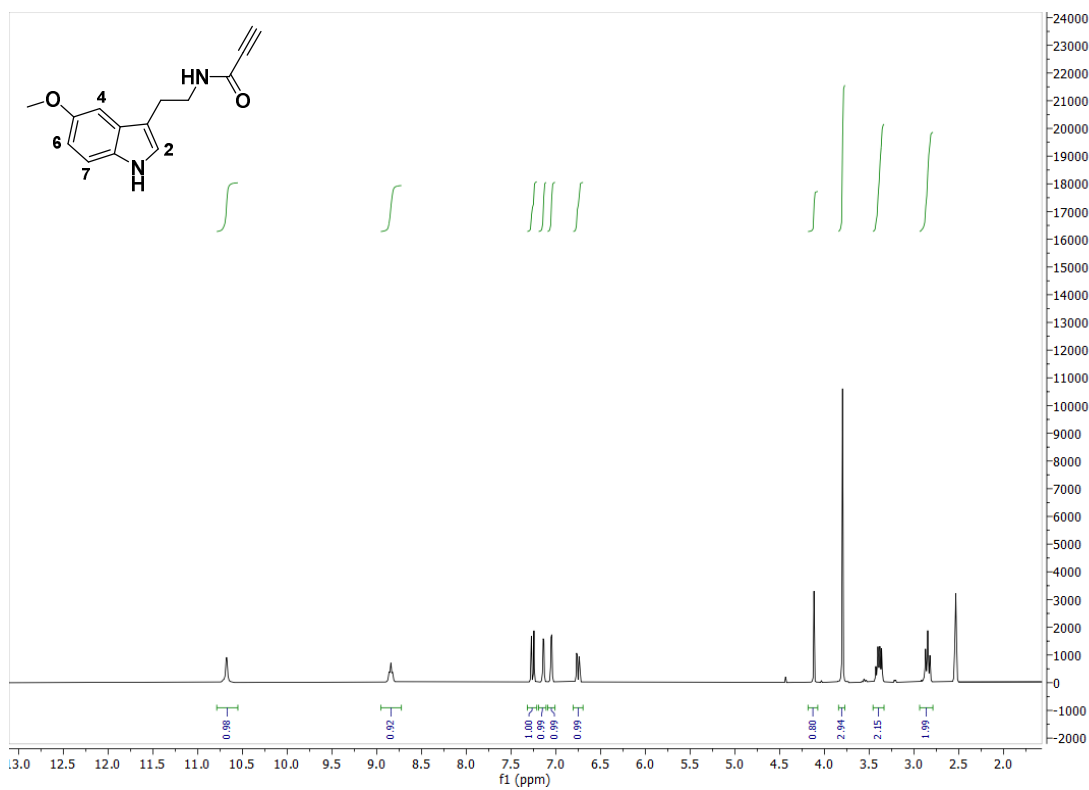

<sup>13</sup>C NMR (75 MHz, DMSO)

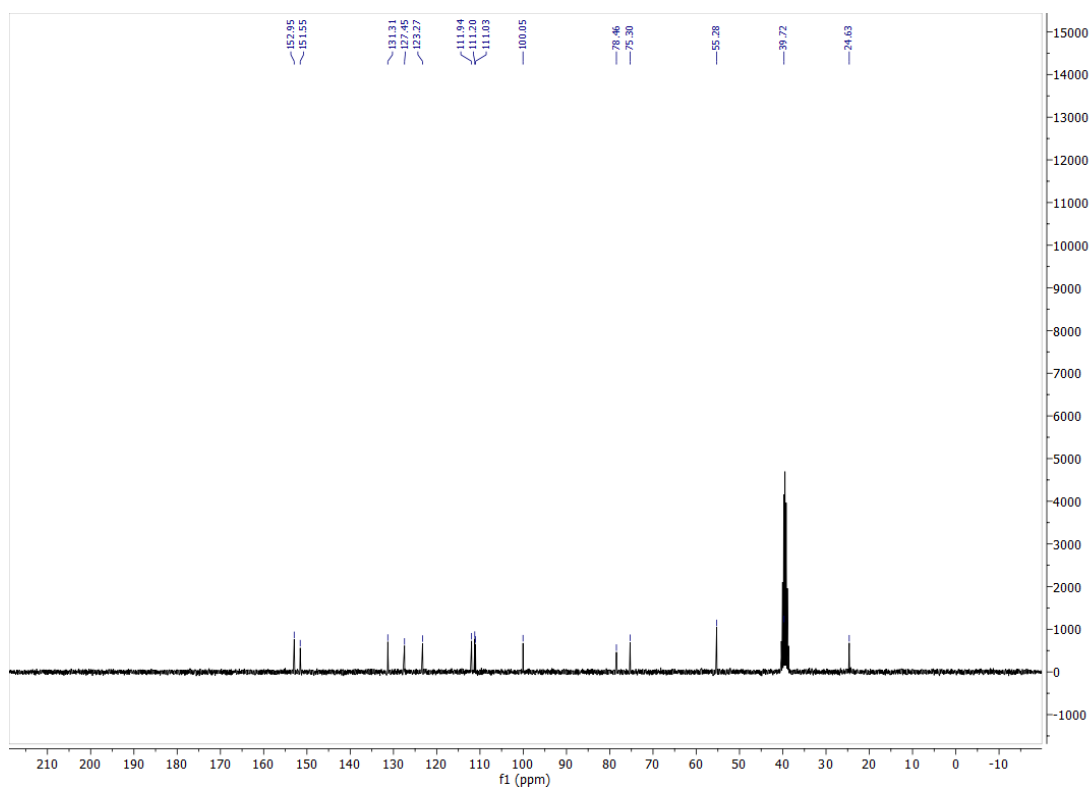

**3-(2-propiolamidoethyl)-1H-indol-5-yl cinnamate (17)**

<sup>1</sup>H NMR (300 MHz, DMSO)

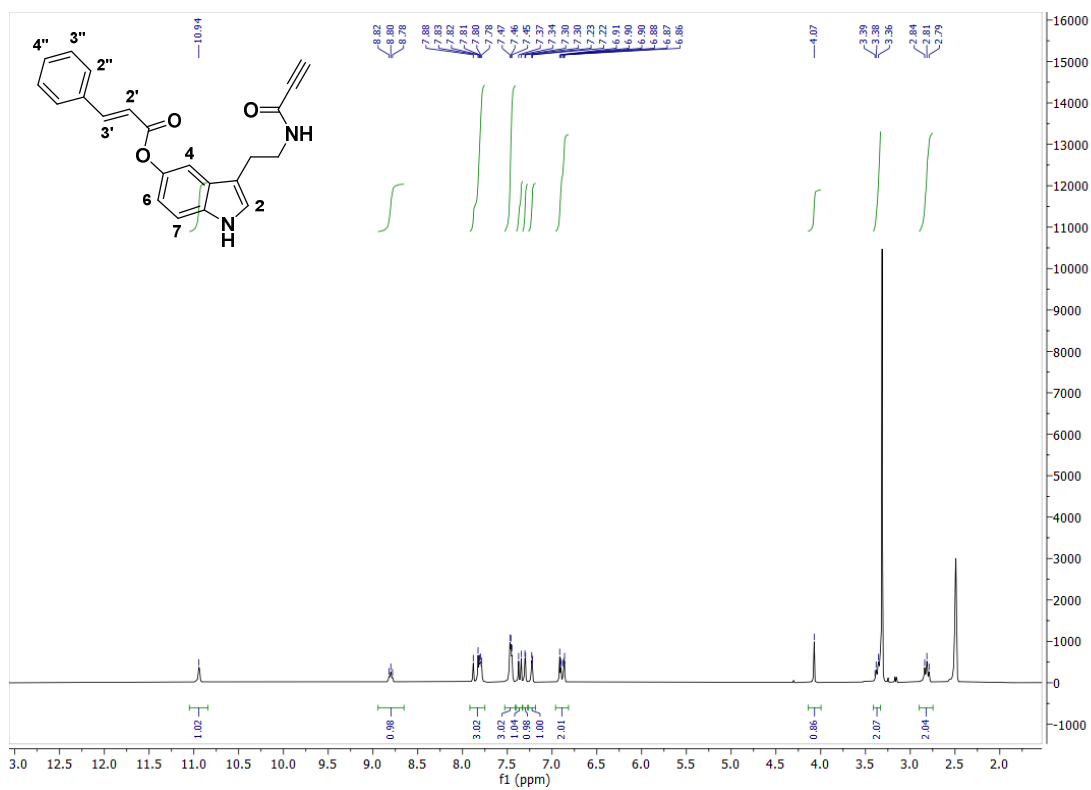

<sup>13</sup>C NMR (75 MHz, DMSO)

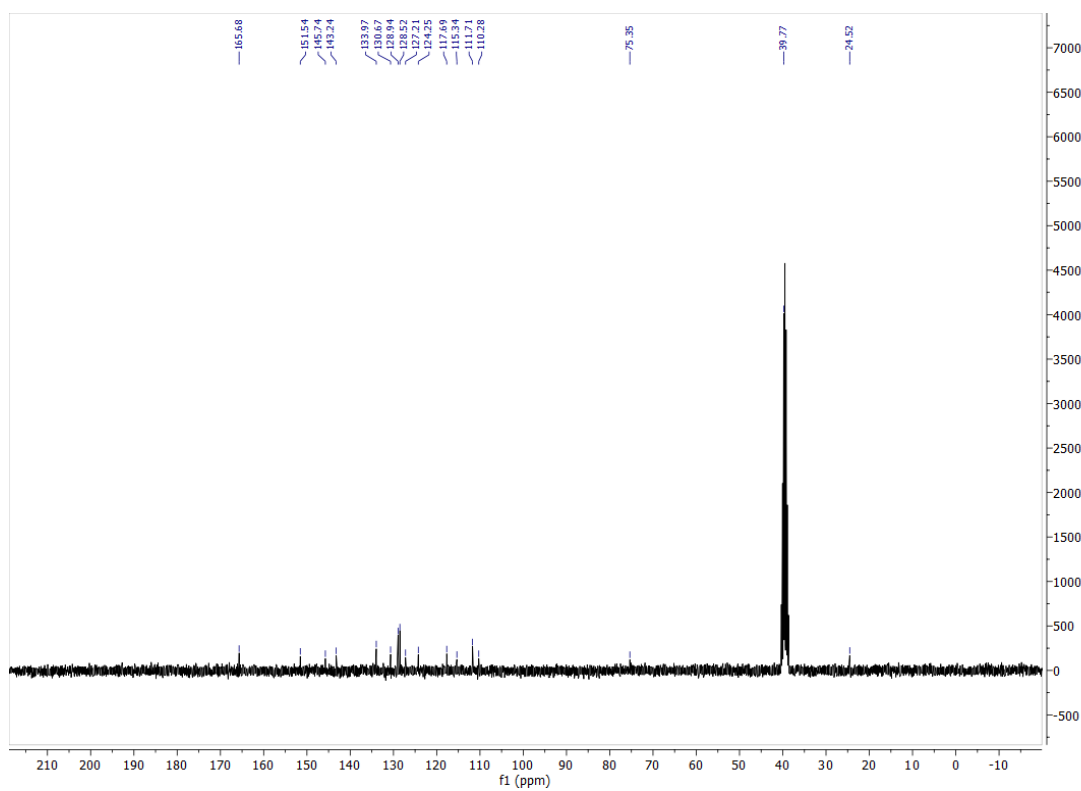

**3-(2-propiolamidoethyl)-1H-indol-5-yl-(E)-3-(p-tolyl) acrylate (18)**

<sup>1</sup>H NMR (300 MHz, DMSO)

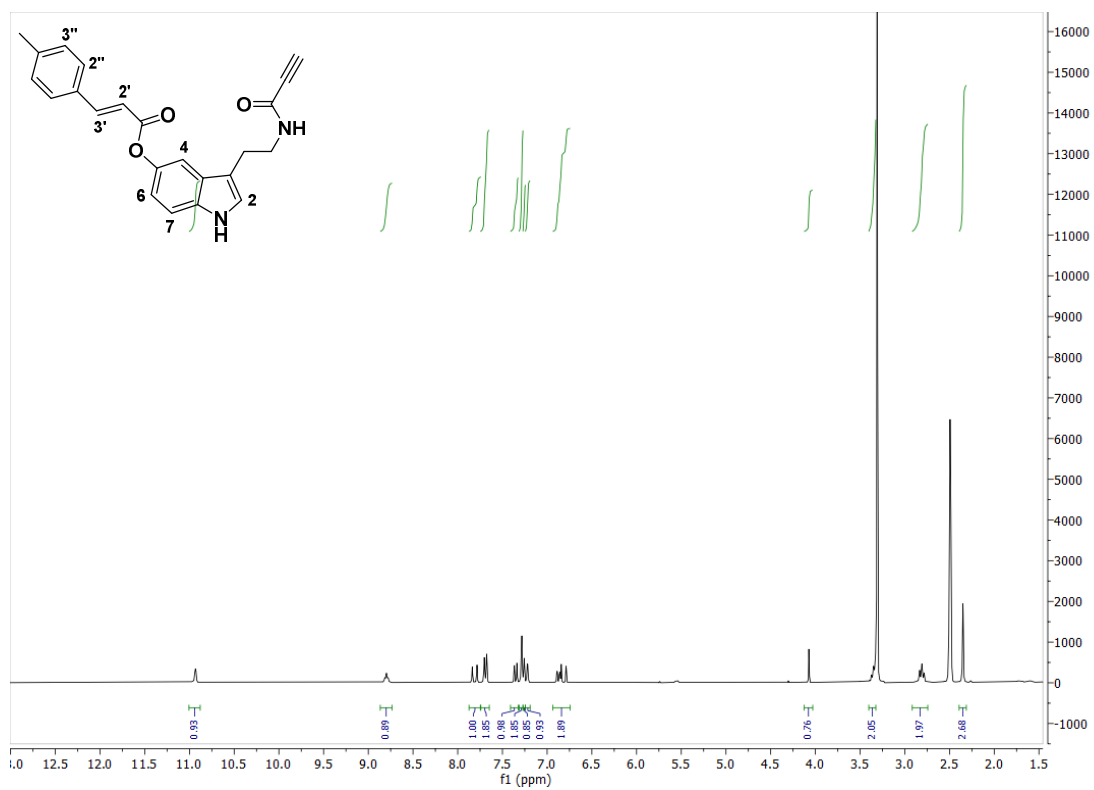

<sup>13</sup>C NMR (75 MHz, DMSO)

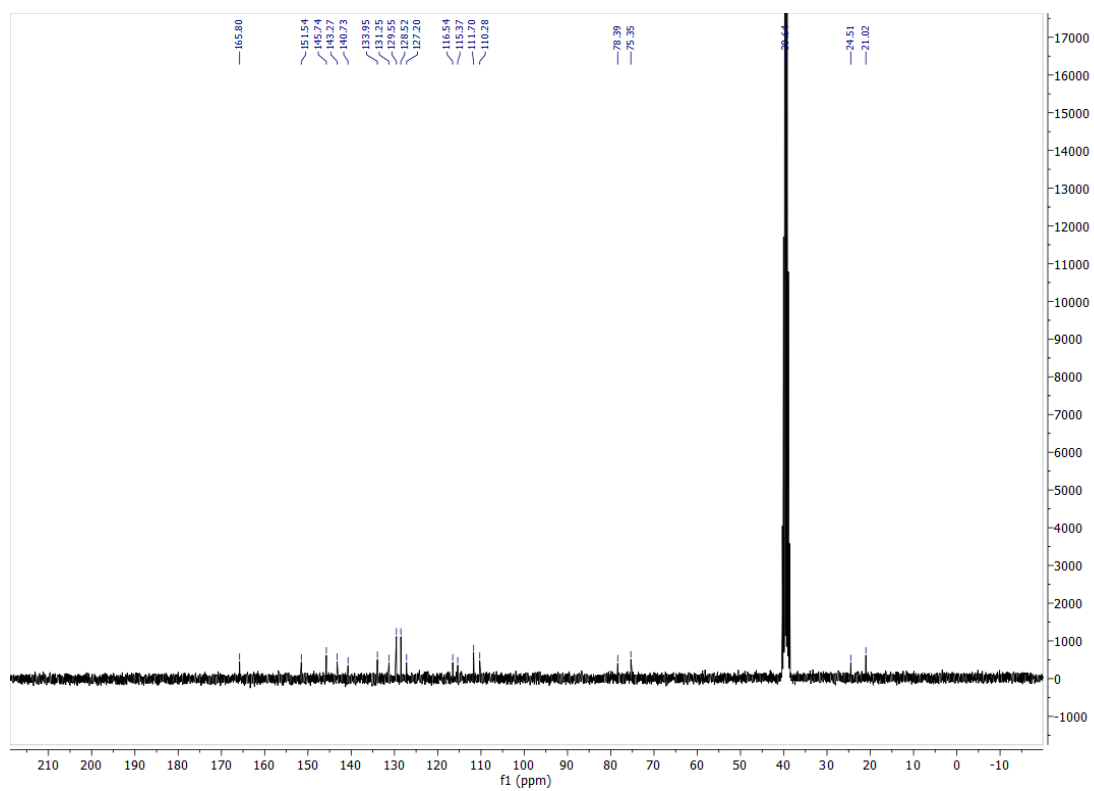

## References

1. Daina, A., O. Michielin, and V. Zoete, *SwissADME: a free web tool to evaluate pharmacokinetics, drug-likeness and medicinal chemistry friendliness of small molecules*. Sci Rep, 2017. **7**: p. 42717.
2. Moriguchi, I., et al., *Simple method of calculating octanol/water partition coefficient*. Chemical and pharmaceutical bulletin, 1992. **40**(1): p. 127-130.
3. Moriguchi, I., et al., *Comparison of reliability of log P values for drugs calculated by several methods*. Chemical and pharmaceutical bulletin, 1994. **42**(4): p. 976-978.
4. Lipinski, C.A., et al., *Experimental and computational approaches to estimate solubility and permeability in drug discovery and development settings*. Adv Drug Deliv Rev, 2001. **46**(1-3): p. 3-26.
5. Ali, J., et al., *In Silico Prediction of Aqueous Solubility Using Simple QSPR Models: The Importance of Phenol and Phenol-like Moieties*. Journal of Chemical Information and Modeling, 2012. **52**(11): p. 2950-2957.
